# Supplementary material
Source: Springer Nature journal article supplement (https://www.springermedizin.de/resource/supplementary/12884_2013_847_MOESM1_ESM.pdf/9458338)
Supplement: MOESM1 [file 9458338]

Tabel 2: Components in relation to sociodemographic characteristics and contraceptive use

|                                | Mean age | n = 138<br>n (%) | Components                             |         |                                        |         |                 |         |
|--------------------------------|----------|------------------|----------------------------------------|---------|----------------------------------------|---------|-----------------|---------|
|                                |          |                  | Importance of fertility for the future |         | Childbearing as a hindrance at present |         | Social identity |         |
|                                |          |                  | Mean (SD)                              | p-value | Mean (SD)                              | p-value | Mean (SD)       | p-value |
| <b>Age</b>                     |          |                  |                                        | .58     |                                        | .00     |                 | .65     |
| <25                            | 22.7     | 78 (56.5)        | 35.6 (8.3)                             |         | 43.0 (11.2)                            |         | 22.4 (5,1)      |         |
| 25-26                          | 25.5     | 26 (18.8)        | 34.6 (7.4)                             |         | 45.4 (9.1)                             |         | 22.2 (4.9)      |         |
| >26                            | 28.2     | 34 (24.6)        | 36.8 (7.0)                             |         | 36.3 (9.7)                             |         | 21.4 (4.5)      |         |
| <b>Civil status</b>            |          |                  |                                        | .08     |                                        | .20     |                 | .38     |
| Having a partner               | 24.8     | 104 (75.4)       | 36.4 (7.3)                             |         | 41.2 (11.1)                            |         | 22.4 (4.5)      |         |
| Single                         | 24.1     | 34 (24.6)        | 33.6 (8.8)                             |         | 44.0 (10.4)                            |         | 21.4 (6.0)      |         |
| <b>Education</b>               |          |                  |                                        | .59     |                                        | .77     |                 | .13     |
| College/university             | 25.1     | 97 (70.3)        | 35.4 (8.2)                             |         | 42.1 (10.2)                            |         | 21.7 (4.7)      |         |
| Cumpulsory school/High school  | 23.3     | 41 (29.7)        | 36.2 (6.9)                             |         | 41.5 (12.5)                            |         | 23.1 (5.3)      |         |
| <b>Occupation</b>              |          |                  |                                        | .02     |                                        | .47     |                 | .13     |
| Studying                       | 23.3     | 45 (32.6)        | 37.9 (6.6)                             |         | 43.4 (9.8)                             |         | 23.2 (4.4)      |         |
| Employed                       | 25.1     | 83 (60.1)        | 35.0 (7.8)                             |         | 41.0 (11.7)                            |         | 21.8 (5.1)      |         |
| Unemployed                     | 26       | 10 (7.2)         | 31.0 (10.0)                            |         | 43,1 (9.2)                             |         | 20.2 (4.8)      |         |
| <b>Residence</b>               |          |                  |                                        | .96     |                                        | .01     |                 | .77     |
| Metropolitan area/large city   | 25.2     | 89 (64.5)        | 35.7 (8.0)                             |         | 43.9 (10.3)                            |         | 22.2 (5.1)      |         |
| Middle sized city/country side | 23.5     | 49 (35.5)        | 35.6 (7.5)                             |         | 38.4 (11.3)                            |         | 22.0 (4.7)      |         |
| <b>Hormonal contraceptives</b> |          |                  |                                        | .41     |                                        | .15     |                 | .18     |
| Yes                            | 24.5     | 121 (87.7)       | 37.1 (6.7)                             |         | 42.5 (10.8)                            |         | 22.4 (4.9)      |         |
| No                             | 25.5     | 17 (12.3)        | 35.4 (7.9)                             |         | 38.3 (11.6)                            |         | 20.7 (4.9)      |         |

Independent-samples T-test och ANOVA
